# Supplementary material for: The BsaHI restriction-modification system: Cloning, sequencing and analysis of conserved motifs
Source: PubMed Central journal article supplement (PMC2413257; doi:10.1186/1471-2199-9-48), 2008-05-14
Supplement: 1471-2199-9-48-S1.pdf [file 1471-2199-9-48-S1.pdf]

|                          |                                           |               |
|--------------------------|-------------------------------------------|---------------|
| M.Hpy99XI/261-281        | N T Y A K M W W E K P A P T I T R N F S T |               |
| M.HpyAORF483P/242-262    | N T Y A K M W W E K P A P T I T R N F S T |               |
| M.PviORF62P/293-313      | N T Y A R L Y P T L P S P T V T R N F G T | ACGT          |
| M.EsaSS117P/265-285      | N V Y A R I D P T Q P S P T I T R N F G T | NXY_F(GS)T    |
| M.EsaSS1516P/179-199     | N S Y G R L W W N K P A T T I T R N F G T |               |
| M.EsaSS1590P/203-223     | N S Y G R L W W N K P S T T I T R N F G T |               |
| M.EsaSS49P/276-296       | N S Y G R L W W N K P A T T I T R N F G T |               |
| M.AluI/413-433           | P S G I R A K R P T Y L P A L V A I T Q T | AGCT          |
| M.EsaSS305P/360-380      | A S G L R V K R P T T S P S L I A F T Q T | XSG_X(QH)X    |
| M.AauTCORF1165AP/359-379 | A S G V R V K R T A T A P S L I A M T H T |               |
| M.MpeORF9800P/338-358    | Q S G I R C K R P I K F P T L V A M V Q I |               |
| M.HhaI/237-257           | Q G E R I Y S T R G I A I T L S A Y G G G |               |
| M.EsaNPORF31P/43-63      | Q G E R I Y S I D G H G I T L S A H G G G | GCGC          |
| M.EsaSS1792P/17-37       | Q G E R I Y S P K G H A I T L S A Y G G G |               |
| M.EsaSS221P/231-251      | Q G E R V Y S P K G H A I T L S A F G G G | QGE_GGG       |
| M.RbeRORF1392P/228-248   | Q G E R I Y S P L G H S I T L S A F G G G |               |
| M.RfeORF137P/225-245     | Q G E R I Y S P F G H S I T L S A F G G G | RQS_RHG       |
| M.HinPII/233-253         | R Q S D L R I Y E N K I P T L R T G R H G |               |
| M.Hpy99III/232-252       | R Q S D L R L Y F N V F P T L R T S R H G |               |
| M.HpyAVIII/226-246       | R Q S D L R L Y S N V F P T L R T S R H G |               |
| M.HacSORF595P/226-246    | R Q S D L R L Y F N V F P T L R T S R H G |               |
| M.HpyHORF1059P/226-246   | R Q S D L R L Y F N V F P T L R T S R H G |               |
| M.BepI/295-315           | Q G N I E V N M N G Q A P T I R A E H H G | CGCG          |
| M.Hin86ORF1460P/297-317  | Q G Q V E I K L N S V G P T I R S E H H G | QG(NQ)_HHG    |
| M.RbeRORF883P/277-297    | Q G N K S V D I N K P A P T I R A E H H G |               |
| M.TdeAORF121P/283-303    | Q G O T E I N P A G L S P T I R A E H H G |               |
| M.BsuFI/312-332          | P Q I V D F R C T Y Q V N T L V A S Y H K |               |
| M.MspI/314-334           | P S L I D K N T T G A V K T L V S T Y H K | CCGG          |
| M.IloORF2528P/308-328    | P I L I D R N T K G P M R T L V S S Y H K | PX(IL)_YHK    |
| M.NmeAI/265-285          | D T F G R L W W D K P A P T I T T K F F S |               |
| M.AplORF1202P/279-299    | D T F G R L W W D Q P S P T I T T K F F S | DTF_FFS       |
| M.MslORFDP/268-288       | D T F G R L W W N K P A P T I T T K F F S |               |
| M.NgoAORF1175P/239-259   | D T F G R L W W D K P A P T I T T K F F S | ERN_IKG       |
| M.NmeI8ORF1992P/265-285  | D T F G R L W W D K P A P T I T T K F F S |               |
| M.HpaII/275-295          | E R N L V I D H R I T D F T P T T N I K G |               |
| M.NlaCORFGP/301-321      | E R N L V I D K R I T D F T P T T N I K G |               |
| M.NlaI17ORFAP/301-321    | E R N L V I D K R I T D F T P T T N I K G |               |
| M.HaeIII/224-244         | S R N R V R Q W N E P A F T V Q A S G R Q |               |
| M.BspRI/297-317          | S R N R K K K W T D Q S F T I Q A S G R Q |               |
| M.BsuRI/298-318          | S R N R K K S W D E Q S F T I Q A S G R Q |               |
| M.NgoAII/239-259         | S R N R V K A W D E Q G F T V Q A S G R Q |               |
| M.NgoBII/239-259         | S R N R V K A W D E Q G F T V Q A S G R Q |               |
| M.NgoLII/239-259         | S R N R V K A W D E Q G F T V Q A S G R Q |               |
| M.NgoPII/239-259         | S R N R V K A W D E Q G F T V Q A S G R Q |               |
| M.NgoSII/239-259         | S R N R V K A W D E Q G F T V Q A S G R Q |               |
| M.FnuDI/227-247          | S R N R V R Q W E Q P A F T V Q A S G R Q |               |
| M.MthTI/225-245          | S R N R V R S W D E V S F T I Q A G G R H |               |
| M.BhaII/212-232          | S R N R K R N W D E V S Y T I P A M A K Q | GGCC          |
| M.Lci22RP/291-311        | S R N R K K S W N E Q S F T I Q A S G R Q |               |
| M.HacSORF1213P/226-246   | S R N R V K N W D E Q A F T I Q A S G R Q | SRN_X(RK)(HQ) |
| M.Mca43617ORFBP/227-247  | S R N H V K A W H E Q G F T V Q A S D R Q |               |
| M.DspBAVPRF79P/224-244   | S R N R V R S W E E P S F T I Q A G G R H |               |
| M.EsaSS1001P/238-258     | S R N R V R S W D E P S F T I Q A S G R H |               |
| M.EsaSS1545P/226-246     | S R N R V R S W N K P S Y T I Q A G G R H |               |
| M.FtuHORF1857P/221-241   | S R N R V R S W D E Q S F T I Q A G G R H |               |
| M.FtuOSUORF1788P/221-241 | S R N R V R S W D E Q S F T I Q A G G R H |               |
| M.AboORF1659P/207-227    | S R N R Y R G W D E L A K T I V S H P R H |               |
| M.EcoWphiP/211-231       | S R N R R Q D W D Q I S K T I V A N P R H |               |
| M.CthORF2320P/221-241    | S R N R K R G W D E V S Y T I P A M A K Q |               |
